# Supplementary material
Source: publisher figshare collection journal article supplement (https://gsapubs.figshare.com/ndownloader/files/23314868)
Supplement: Supplementary file 1 [file 23314868]

## Sheet: zircon U-Pb-trace elements data
TABLE DR1. RESULTS OF ZIRCON U-Pb-TRACE ELEMENT ANALYSIS
	232Th	238U	Th/U	207Pb/206Pb	±1σ	207Pb/235U	±1σ	206Pb/238U	±1σ	Rho	208Pb/232Th	±1σ	207Pb/206Pb	±1σ	207Pb/235U	±1σ	206Pb/238U	±1σ	208Pb/232Th	±1σ
Spot no.	ppm	ppm		Ratio	Ma	Ratio	Ma	Ratio	Ma		Ratio	Ma	Age (Ma)	Ma	Age (Ma)	Ma	Age (Ma)	Ma	Age (Ma)	Ma
U-Pb for sample 16ALT59 (N39°12’01.6’’, E92°32’42.8’’)
16ALT59-1	52.4867	103.002	0.509571	0.165093	0.00375367	9.69772	0.207595	0.422487	0.00525152	0.580663	0.116296	0.00272153	2508.34	37.965	2406.49	19.7719	2271.76	23.8304	2223.66	49.2774
16ALT59-2	14.528	14.7129	0.987434	0.121154	0.00412333	5.7707	0.187212	0.35445	0.00799211	0.695026	0.10157	0.00362751	1973.15	55.3975	1942.03	28.1067	1955.81	38.0526	1955.27	66.5595
16ALT59-3	81.2297	125.346	0.648041	0.179551	0.00311729	12.2047	0.268283	0.484421	0.00641686	0.602607	0.141765	0.00347045	2650.01	29.0125	2620.27	20.7065	2546.49	27.9005	2679.65	61.4361
16ALT59-4	7.30174	9.09447	0.802876	0.121746	0.0047504	5.96703	0.231935	0.358243	0.00800262	0.574708	0.093579	0.00351313	1983.34	69.445	1971.05	33.829	1973.84	37.9965	1808.1	64.9319
16ALT59-5	86.4985	116.677	0.741347	0.177088	0.00273764	11.4341	0.198234	0.462729	0.00578287	0.720837	0.124464	0.00248659	2625.61	25.93	2559.21	16.2814	2451.6	25.5201	2371.03	44.6964
16ALT59-6	7.84798	10.2641	0.764605	0.123397	0.00520145	5.68539	0.257601	0.332009	0.00728057	0.48398	0.102629	0.00400944	2005.87	75.1475	1929.15	39.1467	1848.11	35.2493	1974.68	73.4967
16ALT59-7	418.396	427.465	0.978785	0.151045	0.00249241	7.83542	0.18888	0.369238	0.00655099	0.735999	0.1044	0.00259006	2357.72	28.855	2212.28	21.7585	2025.81	30.8617	2007.12	47.4021
16ALT59-8	18.5941	44.7803	0.41523	0.121588	0.00319888	6.05681	0.156409	0.358006	0.00498498	0.539209	0.0983122	0.00303216	1979.94	46.905	1984.05	22.5456	1972.71	23.6875	1895.39	55.8009
16ALT59-9	11.2733	35.5595	0.317025	0.134166	0.00330426	6.48438	0.151967	0.348022	0.00478869	0.587124	0.100018	0.0032035	2153.39	42.9	2043.78	20.6636	1925.15	22.9237	1926.76	58.8625
16ALT59-10	16.5351	14.4387	1.14519	0.123812	0.00568964	5.95773	0.236363	0.357974	0.00859565	0.605241	0.100725	0.00371749	2012.96	81.48	1969.69	34.5199	1972.56	40.8182	1939.75	68.2629
16ALT59-11	90.1222	138.148	0.652359	0.166029	0.00340928	10.3903	0.258526	0.44341	0.00701095	0.635466	0.123565	0.00322738	2518.21	35.34	2470.18	23.1074	2365.89	31.3376	2354.86	58.0586
16ALT59-12	83.2206	116.75	0.712809	0.183095	0.00360558	11.6267	0.240366	0.453558	0.00617182	0.658208	0.125572	0.00292836	2681.17	31.6325	2574.82	19.4083	2411.05	27.4025	2390.92	52.5854
16ALT59-13	10.0391	15.7043	0.639256	0.128298	0.00421882	5.98184	0.204816	0.339407	0.00701625	0.603747	0.09759	0.00316834	2075.92	57.5625	1973.21	29.8171	1883.81	33.7838	1882.1	58.3453
16ALT59-14	4.68295	17.5095	0.267452	0.16762	0.00423516	10.2823	0.259546	0.442166	0.00742569	0.665317	0.121086	0.00613003	2600	42.285	2460.51	23.4184	2360.33	33.2169	2310.22	110.519
16ALT59-15	8.27713	10.191	0.812199	0.120481	0.00474058	5.76832	0.212943	0.354218	0.00852235	0.65174	0.108959	0.00461134	1964.82	70.0625	1941.67	31.973	1954.71	40.5822	2090.39	84.0476
16ALT59-16	63.944	94.161	0.679092	0.153232	0.00364293	8.73203	0.226137	0.407955	0.00604171	0.571863	0.121711	0.00336172	2383.34	45.365	2310.43	23.646	2205.56	27.688	2321.49	60.5752
16ALT59-17	5.38365	18.1793	0.296143	0.15112	0.00518619	8.28245	0.310199	0.394385	0.00836509	0.566328	0.110623	0.00539733	2358.95	58.64	2262.4	33.9668	2143.13	38.6902	2120.69	98.226
16ALT59-18	18.9354	241.79	0.0783135	0.134425	0.00339108	6.95865	0.246584	0.365975	0.00773957	0.596796	0.105603	0.00379677	2166.66	38.735	2106.17	31.4923	2010.43	36.5413	2029.13	69.4111
16ALT59-19	12.4702	13.9053	0.896795	0.124032	0.00560477	6.01325	0.270119	0.352831	0.00982367	0.619813	0.104551	0.0054461	2016.66	81.015	1977.76	39.1312	1948.1	46.8229	2009.88	99.6584
16ALT59-20	39.6513	31.1748	1.2719	0.121233	0.00449933	5.86189	0.206478	0.349678	0.00696343	0.565352	0.0990914	0.00327528	1975.93	66.045	1955.61	30.5824	1933.06	33.2755	1909.73	60.2322
16ALT59-21	14.6329	16.2312	0.901528	0.123705	0.00474302	6.05908	0.216459	0.360695	0.00834057	0.647272	0.10546	0.00411747	2010.18	68.2025	1984.38	31.1648	1985.47	39.5287	2026.51	75.2838
16ALT59-22	74.7817	119.099	0.627896	0.185034	0.00361979	13.5206	0.293279	0.523932	0.00715303	0.629407	0.150803	0.00370059	2698.46	32.8725	2716.73	20.5911	2715.83	30.2937	2839.01	64.9957
16ALT59-23	27.8014	42.1999	0.658803	0.121768	0.00469272	5.93718	0.201403	0.354946	0.0107196	0.890284	0.107573	0.00439713	1983.34	63.885	1966.69	29.5093	1958.17	51.0113	2065.1	80.2437
16ALT59-24	103.604	137.094	0.755718	0.121623	0.00283345	5.25493	0.119568	0.310364	0.00421138	0.596352	0.0931079	0.00234904	1979.94	41.2	1861.57	19.4512	1742.5	20.7395	1799.39	43.4352
16ALT59-25	10.707	9.40758	1.13813	0.135191	0.00735828	5.95018	0.320775	0.326717	0.0118272	0.671493	0.101964	0.00450605	2166.35	95.0675	1968.59	46.8826	1822.45	57.476	1962.48	82.6501
U-Pb for sample 16ALT62 (N39°13’39.3’, E92°39’50.9’’)
16ALT62-1	26.9198	225.946	0.119143	0.16758	0.00338641	11.1355	0.233426	0.482002	0.00893525	0.884339	0.133351	0.00454971	2600	34.72	2534.54	19.6067	2535.98	38.8907	2530.13	81.1398
16ALT62-2	25.0413	359.998	0.0695595	0.162322	0.00276911	9.65438	0.172215	0.428252	0.00535569	0.701085	0.124939	0.00370877	2479.93	28.7075	2402.37	16.4935	2297.83	24.2047	2379.56	66.637
16ALT62-3	93.5682	231.319	0.404499	0.16877	0.00276314	11.3677	0.260957	0.484765	0.00885917	0.796095	0.168487	0.00770886	2545.36	27.47	2553.78	21.4948	2547.99	38.4885	3147.24	133.346
16ALT62-4	74.3436	459.908	0.161649	0.158909	0.00253123	9.13841	0.165342	0.413832	0.00479446	0.64033	0.13167	0.00314757	2444.13	27.6225	2351.96	16.6364	2232.42	21.8937	2500.14	56.2173
16ALT62-5	98.3655	253.441	0.388119	0.176307	0.0027851	12.2464	0.195056	0.501209	0.00483718	0.605932	0.148319	0.00460079	2618.21	31.9475	2623.47	15.0577	2618.99	20.8197	2795.33	80.9811
16ALT62-6	42.4823	377.981	0.112393	0.16293	0.00260118	10.5851	0.18612	0.468072	0.00512303	0.622471	0.138564	0.00303269	2486.11	27.165	2487.41	16.4	2475.1	22.5353	2622.89	53.8374
16ALT62-7	68.4755	762.356	0.0898208	0.170869	0.00283328	11.5432	0.227028	0.486796	0.00653113	0.682165	0.131945	0.00310964	2566.35	27.78	2568.09	18.4608	2556.8	28.3511	2505.06	55.5263
16ALT62-8	266.716	405.971	0.656982	0.169592	0.00318947	11.3734	0.249075	0.484892	0.00819541	0.77177	0.144611	0.00479609	2553.39	31.485	2554.25	20.5131	2548.54	35.6056	2729.96	84.6922
16ALT62-9	1096.53	576.39	1.90241	0.170187	0.00344692	11.4465	0.395471	0.485654	0.0149178	0.889069	0.159741	0.00940949	2561.11	34.725	2560.22	32.3095	2551.84	64.7448	2995.38	163.991
16ALT62-10	108.698	58.9913	1.8426	0.176514	0.00374008	12.3528	0.289042	0.503589	0.00720999	0.611873	0.132575	0.0031341	2620.68	35.185	2631.59	22.0524	2629.2	30.9444	2516.29	55.932
16ALT62-11	114.14	136.769	0.834547	0.175247	0.0032408	12.2019	0.258821	0.500502	0.00740733	0.697726	0.133591	0.00333118	2608.34	30.555	2620.06	19.9859	2615.95	31.8545	2534.41	59.3959
16ALT62-12	96.6561	124.146	0.77857	0.179777	0.00323993	12.5404	0.243614	0.500059	0.00607334	0.625194	0.138758	0.00366072	2650.93	29.9375	2645.76	18.3568	2614.05	26.138	2626.35	64.9754
16ALT62-13	80.0822	194.493	0.411748	0.170552	0.00311903	11.5775	0.215858	0.486838	0.00605021	0.666548	0.126875	0.00350558	2564.81	31.02	2570.86	17.5138	2556.98	26.2679	2414.31	62.8779
16ALT62-14	87.6101	474.745	0.184541	0.157148	0.00309165	9.9712	0.213876	0.453864	0.00691106	0.709913	0.119304	0.00327127	2424.99	33.33	2432.12	19.8631	2412.41	30.6712	2278.06	59.0721
16ALT62-15	60.485	901.844	0.0670681	0.164299	0.00338261	11.0508	0.233159	0.480448	0.0067775	0.668597	0.12944	0.00353911	2501.85	34.875	2527.42	19.7207	2529.22	29.5433	2460.27	63.3353
16ALT62-16	118.303	239.24	0.494495	0.178244	0.00415119	12.168	0.266537	0.487108	0.00634708	0.594853	0.145371	0.00482917	2636.73	39.3525	2617.44	20.6296	2558.15	27.5484	2743.38	85.2198
16ALT62-17	70.3492	364.479	0.193013	0.156984	0.00402828	9.92735	0.244149	0.450708	0.00684077	0.617147	0.121546	0.00396261	2423.14	43.515	2428.05	22.7466	2398.4	30.4255	2318.51	71.4131
16ALT62-18	47.4871	87.2473	0.544281	0.185104	0.00464278	13.3309	0.354534	0.513263	0.0091784	0.672401	0.132954	0.00432694	2699.07	41.36	2703.37	25.1869	2670.54	39.126	2523.05	77.1938
16ALT62-19	245.158	598.036	0.409939	0.150383	0.003311	9.37703	0.21775	0.444094	0.00659498	0.639506	0.12911	0.00344194	2350.31	32.5625	2375.58	21.3678	2368.94	29.4677	2454.37	61.6143
16ALT62-20	50.7008	134.35	0.377378	0.168307	0.00401539	11.2248	0.291543	0.475485	0.00766089	0.620322	0.136425	0.00602234	2542.59	39.3525	2541.97	24.277	2507.57	33.4979	2584.89	107.112
16ALT62-21	26.6457	330.756	0.08056	0.16898	0.00379395	9.79392	0.201576	0.414354	0.00545736	0.639925	0.116583	0.00365601	2547.83	37.655	2415.58	19.0332	2234.8	24.9031	2228.86	66.1805
16ALT62-22	118.268	267.163	0.442682	0.168187	0.00299774	11.2568	0.236559	0.477941	0.00720189	0.717046	0.144393	0.00351369	2539.81	29.935	2544.63	19.6734	2518.29	31.4423	2726.1	62.0587
16ALT62-23	48.1566	56.9484	0.845619	0.120555	0.00431754	5.82184	0.19226	0.347079	0.0054255	0.473351	0.0979051	0.00354569	1964.51	64.35	1949.67	28.6472	1920.63	25.9843	1887.9	65.2755
16ALT62-24	468.537	544.254	0.86088	0.166624	0.00293774	8.11868	0.156508	0.348441	0.00431905	0.642997	0.0755158	0.00167165	2523.76	29.625	2244.33	17.4941	1927.15	20.674	1471.46	31.4154
16ALT62-25	54.3951	391.128	0.139073	0.168931	0.00294931	10.9264	0.208057	0.4631	0.00588797	0.667707	0.0955625	0.00327496	2547.22	29.325	2516.89	17.7959	2453.23	25.9762	1844.73	60.4203
16ALT62-26	463.491	1047	0.442685	0.159085	0.00281469	8.57375	0.17675	0.385261	0.00493661	0.621563	0.101409	0.00253565	2445.98	29.4725	2293.78	18.8107	2100.81	23.0009	1952.31	46.5322
U-Pb for sample 16ALT69 (N39°09’35.6’’, E92°18’32.4’’)
16ALT69-1	300.466	640.805	0.468889	0.121426	0.00239142	6.0703	0.132586	0.35864	0.00468052	0.597513	0.101661	0.00274493	1977.47	35.18	1985.99	19.0889	1975.72	22.2335	1956.93	50.3613
16ALT69-2	77.6902	146.31	0.530998	0.119693	0.00239098	5.86743	0.127227	0.351791	0.00440243	0.577134	0.0962154	0.0023175	1951.55	35.0325	1956.43	18.8581	1943.15	21.0205	1856.77	42.7306
16ALT69-3	151.004	597.403	0.252768	0.117309	0.00215379	5.17641	0.101918	0.316022	0.003809	0.612168	0.0864985	0.00202175	1916.66	33.335	1848.75	16.8022	1770.27	18.6825	1676.81	37.6108
16ALT69-4	104.719	280.12	0.373835	0.115736	0.00216159	5.33606	0.110034	0.329991	0.00447482	0.657608	0.0937059	0.00233956	1891.66	33.6425	1874.66	17.6795	1838.34	21.712	1810.45	43.2362
16ALT69-5	233.608	579.879	0.402856	0.121788	0.00199413	6.13973	0.108148	0.360574	0.00400409	0.630434	0.10231	0.00220351	1983.34	29.625	1995.91	15.4401	1984.9	19.0017	1968.84	40.4041
16ALT69-6	256.419	749.545	0.342099	0.117907	0.00193802	5.77125	0.109784	0.349869	0.00450034	0.676194	0.102119	0.00229336	1925	29.635	1942.11	16.5155	1933.97	21.5171	1965.32	42.059
16ALT69-7	192.36	2606.29	0.0738062	0.112921	0.00195699	4.04876	0.0906581	0.255739	0.00413279	0.721708	0.211222	0.00602027	1847.22	31.4825	1644.05	18.267	1468.01	21.2307	3873.27	100.463
16ALT69-8	168.579	448.764	0.375652	0.116475	0.0021682	5.49638	0.111654	0.337067	0.00441833	0.645274	0.0985692	0.00283869	1902.78	33.6425	1900.03	17.4993	1872.54	21.3261	1900.12	52.2282
16ALT69-9	197.637	2285.18	0.0864867	0.101061	0.00206065	2.3129	0.118175	0.160538	0.00670127	0.816981	0.0506732	0.00264628	1643.52	37.8075	1216.25	36.2293	959.766	37.227	999.113	50.9075
16ALT69-10	140.696	360.985	0.389755	0.115064	0.00216852	5.05336	0.108467	0.313522	0.00417481	0.620371	0.0894037	0.00239617	1881.17	33.945	1828.31	18.2366	1758.01	20.5108	1730.78	44.4573
16ALT69-11	309.622	805.577	0.384349	0.116402	0.0018849	5.09778	0.0931498	0.313228	0.00387002	0.676164	0.090041	0.00193486	1901.54	29.48	1835.74	15.5612	1756.57	19.021	1742.6	35.8774
16ALT69-12	97.6605	588.09	0.166064	0.118029	0.0021778	5.51785	0.144622	0.335582	0.00761579	0.865866	0.0947894	0.00236819	1927.79	33.335	1903.38	22.5671	1865.38	36.7727	1830.46	43.7221
16ALT69-13	134.516	1027.17	0.130958	0.117977	0.00182251	4.76693	0.083487	0.289595	0.00342652	0.675587	0.0875523	0.00206369	1925.62	27.935	1779.09	14.7493	1639.51	17.1513	1696.4	38.3538
16ALT69-14	63.1831	135.591	0.465983	0.120049	0.00207813	5.93355	0.128516	0.354505	0.00502079	0.653896	0.100924	0.00251366	1966.67	30.865	1966.16	18.8679	1956.07	23.9185	1943.4	46.1492
16ALT69-15	80.5477	133.96	0.601284	0.121085	0.00235886	5.55624	0.122069	0.330895	0.00481913	0.66291	0.0998068	0.00239128	1972.53	33.7925	1909.34	18.9496	1842.72	23.3635	1922.88	43.9468
16ALT69-16	54.4695	104.7	0.520245	0.119412	0.00265416	5.38933	0.140747	0.32532	0.00572842	0.67425	0.0939496	0.00251004	1947.22	39.97	1883.16	22.4039	1815.66	27.8805	1814.95	46.3764
16ALT69-17	42.2032	99.5794	0.423815	0.120808	0.00321727	5.19412	0.13661	0.310683	0.00499576	0.611382	0.0969099	0.00343104	1968.21	48.1475	1851.65	22.4295	1744.07	24.589	1869.57	63.2221
16ALT69-18	571.709	5242.07	0.109062	0.107208	0.00195294	2.52845	0.0820501	0.167728	0.00374432	0.687929	0.0561882	0.00197092	1753.7	33.335	1280.25	23.6276	999.578	20.6775	1104.93	37.7175
16ALT69-19	171.146	510.179	0.335462	0.118068	0.00201388	5.29715	0.108324	0.322251	0.00403481	0.612272	0.0976856	0.00235177	1927.79	29.785	1868.4	17.5129	1800.71	19.6951	1883.86	43.3043
16ALT69-20	65.7915	161.186	0.408172	0.118309	0.00212934	5.58263	0.111647	0.339969	0.00443424	0.652189	0.100964	0.00245488	1931.49	32.1	1913.42	17.2708	1886.52	21.3569	1944.15	45.0683
16ALT69-21	53.7631	97.3491	0.552271	0.120779	0.00215203	5.74702	0.11547	0.342229	0.00444531	0.646483	0.101148	0.00246623	1968.52	31.7875	1938.47	17.4275	1897.39	21.3744	1947.51	45.2692
16ALT69-22	921.65	1516.37	0.6078	0.109132	0.00172644	3.03248	0.0536705	0.199024	0.00205031	0.582071	0.0597077	0.00116855	1784.88	23.3025	1415.83	13.5486	1170.07	11.0413	1172.17	22.2882
16ALT69-23	61.6393	110.565	0.557496	0.120814	0.0022955	5.97286	0.160443	0.355156	0.00776592	0.814022	0.0979241	0.00221698	1968.21	28.545	1971.9	23.402	1959.17	36.9573	1888.25	40.8135
16ALT69-24	207.578	422.789	0.490973	0.12416	0.00219646	6.03666	0.121687	0.347846	0.00457439	0.652379	0.102343	0.00240294	2016.97	31.475	1981.15	17.6109	1924.3	21.9029	1969.44	44.0596
16ALT69-25	43.9056	92.1803	0.476301	0.117752	0.0025116	5.35675	0.119011	0.325487	0.00397217	0.549299	0.097949	0.00251007	1924.08	38.735	1877.97	19.0528	1816.47	19.3433	1888.71	46.2081
Spot no.	29Si	49Ti	89Y	91ZrO2	139La	140Ce	141Pr	146Nd	147Sm	153Eu	157Gd	159Tb	163Dy	165Ho	166Er	169Tm	172Yb	175Lu	178Hf	181Ta	Pb Total
	ppm	ppm	ppm	wt%	ppm	ppm	ppm	ppm	ppm	ppm	ppm	ppm	ppm	ppm	ppm	ppm	ppm	ppm	ppm	ppm	ppm
Trace element for sample 16ALT59
16ALT59-1	152662	4.58602	264.298	61.6114	0.0184898	14.4023	0.0429274	0.511269	0.916352	0.30249	5.2445	1.83594	22.2985	8.80992	39.8637	9.05132	88.7469	19.0631	10982.1	0.61061	59.1421
16ALT59-2	152662	7.68899	264.529	59.8588	N.D.*	17.4185	0.0360069	0.863279	1.52122	0.4176	6.21532	1.90945	22.6776	8.2833	39.713	8.70896	86.3275	18.5002	9345.63	0.499558	7.24359
16ALT59-3	152662	4.59494	389.83	60.8439	1.21675	18.6208	0.384159	2.28822	2.17632	0.473462	9.87813	3.05349	34.8554	12.7681	58.6949	12.558	117.671	24.8307	9107.94	0.566745	86.313
16ALT59-4	152662	3.91796	193.631	61.4251	0.00264719	13.1394	0.0294402	0.543782	0.971971	0.269131	4.59601	1.37906	16.3508	6.19958	28.908	6.30103	62.9947	13.5528	9002.06	0.4282	4.39334
16ALT59-5	152662	6.73617	416.31	65.2641	0.0398145	16.412	0.0835781	1.42123	2.67662	0.622288	11.9548	3.43783	37.7013	13.808	61.8021	13.0829	121.212	25.4165	9175.38	0.50204	76.2242
16ALT59-6	152662	4.73168	170.693	66.2741	0.00607399	12.4911	0.0296408	0.285582	0.842442	0.267493	4.1224	1.17022	13.6659	5.3294	25.584	5.59977	56.2902	11.899	9214.02	0.38397	4.74312
16ALT59-7	152662	8.0201	897.964	67.4936	0.967887	48.9666	0.693792	5.40521	5.77032	3.34971	25.553	7.59629	82.7415	30.1523	133.34	26.8358	246.48	49.339	9346.59	0.772702	225.092
16ALT59-8	152662	6.06396	136.322	61.8265	0.000904913	10.1625	0.0249657	0.255916	0.789468	0.156943	2.94299	0.973699	10.7689	4.03322	20.4795	4.62236	47.217	10.5984	7998.99	0.417263	20.6888
16ALT59-9	152662	6.44884	184.96	68.3069	0.0114842	16.6775	0.0323237	0.58662	1.03404	0.29477	4.07912	1.32972	15.1609	5.8691	27.5509	6.10215	61.3047	13.5305	9777.91	0.422718	15.9066
16ALT59-10	152662	3.89326	249.721	66.1299	N.D.*	15.6398	0.0479965	0.739806	1.34721	0.425491	6.23866	1.86319	21.4951	8.11159	37.1164	7.929	78.9906	16.9919	8068.79	0.401464	7.80924
16ALT59-11	152662	5.6287	337.97	76.3989	0.913172	21.7162	0.266327	1.57752	1.61774	0.367889	8.29281	2.49875	28.738	10.9379	49.8283	10.564	99.6735	21.1447	9409.79	0.441319	83.7998
16ALT59-12	152662	22.2077	328.937	81.2404	5.19631	27.6581	1.4224	6.32017	2.50924	0.640412	9.18606	2.71237	28.9366	10.6639	48.5455	10.4114	96.529	20.5118	8873.99	0.380396	76.5109
16ALT59-13	152662	6.4319	166.821	83.6247	0.000285093	12.9271	0.0281593	0.476741	0.723804	0.187479	3.66673	1.12835	13.4598	5.19441	24.4915	5.47967	54.9103	11.9882	8923.42	0.312896	7.10304
16ALT59-14	152662	5.58634	196.695	85.5204	0.00158126	13.2531	0.0189357	0.402694	0.683315	0.216716	4.24486	1.28644	15.2354	5.97356	28.5559	6.6601	67.5305	14.8614	10184.1	0.375389	9.99035
16ALT59-15	152662	5.40901	173.57	79.5293	0.012823	11.7767	0.0156585	0.401304	1.12116	0.259307	4.35693	1.29369	14.5205	5.29144	25.0427	5.78152	55.893	12.3542	8385.04	0.294185	5.03476
16ALT59-16	152662	6.31878	314.718	86.474	0.083347	16.2536	0.07327	0.965045	1.79779	0.489485	8.77373	2.61197	27.8968	10.3741	46.7549	9.77637	91.922	19.2327	8680.64	0.382874	53.3626
16ALT59-17	152662	3.02249	174.905	96.1401	0.00759149	13.7384	0.0455052	0.340367	0.753262	0.216323	3.62693	1.21636	13.8475	5.41924	26.6203	6.00733	60.9929	13.2269	10110.1	0.35767	9.1514
16ALT59-18	152662	5.41768	131.934	95.3479	0.0119695	9.52586	0.0314464	0.255911	0.67238	0.187919	2.7945	0.889553	10.454	4.1184	18.9288	4.49853	45.8063	10.4569	9735.77	0.680282	102.53
16ALT59-19	152662	6.94928	171.057	96.9394	0.0104978	12.7932	0.0419664	0.431444	0.834114	0.307756	4.08473	1.2362	13.0249	5.34115	24.8159	5.59451	57.5286	12.0971	8910.56	0.332298	7.05117
16ALT59-20	152662	7.00452	457.038	92.5657	0.0113766	26.2252	0.11071	1.93742	2.51935	0.635988	12.0572	3.37391	39.6894	14.412	65.6232	14.3067	135.415	30.0298	7967.36	0.524733	16.93
16ALT59-21	152662	5.02102	244.342	90.6065	0.0357393	19.4089	0.0683434	0.881936	1.55765	0.694598	5.98834	1.69303	19.7323	7.69761	35.2055	7.72679	76.2572	16.1266	8260.08	0.384008	8.3432
16ALT59-22	152662	6.24294	304.886	93.7319	N.D.*	15.922	0.0241194	0.715927	1.3215	0.358824	7.00554	2.23312	25.6423	9.74883	45.3521	9.87403	92.7784	19.8194	8930.79	0.412611	87.2881
16ALT59-23	152662	3.09632	133.443	91.5024	N.D.*	8.20466	0.02918	0.644526	0.70005	0.230988	3.47222	0.94072	10.838	4.16395	20.7149	4.56156	46.2212	11.597	7855.55	0.469586	20.8212
16ALT59-24	152662	1.19302	515.756	108.616	0.119689	27.0421	0.109543	1.79239	3.26209	0.737056	15.025	4.26791	46.1876	16.6279	72.1627	14.9577	140.006	28.1554	9711.34	0.40049	60.6525
16ALT59-25	152662	13.0377	196.454	113.815	0.14398	15.4415	0.105804	1.00402	1.24981	0.529495	5.1961	1.44931	16.252	6.30804	28.7528	6.3248	63.2916	13.3538	8352.58	0.272456	4.70372
Trace element for sample 16ALT62
16ALT62-1	152662	5.23456	136.316	61.527	0.0332091	3.76148	0.0366174	0.246345	0.2829	0.223998	1.55103	0.625805	9.27876	3.9146	22.2726	5.89653	69.4388	18.1001	11367.8	0.471817	130.176
16ALT62-2	152662	4.57253	175.88	64.3421	0.0877255	3.99329	0.0444643	0.292762	0.275119	0.253011	2.40532	0.828004	11.3208	5.13023	28.9993	7.78429	91.4945	23.9321	12425.4	0.681654	187.489
16ALT62-3	152662	13.454	280.947	58.1412	3.3166	42.6658	3.08527	18.6645	3.54477	1.82111	6.22842	1.67248	20.5626	8.47904	44.949	10.6464	115.11	28.5188	11774.7	0.53217	142.91
16ALT62-4	152662	4.59128	258.863	61.4063	0.344656	8.84678	0.233632	1.7232	0.644388	0.399162	3.20527	1.20626	17.1153	7.42198	41.6257	10.8808	124.303	30.1516	12198.5	0.649049	238.497
16ALT62-5	152662	3.92055	391.037	55.3396	0.20923	13.4597	0.276865	2.24504	1.64356	0.754037	8.96129	2.6855	32.4355	12.674	60.6982	13.4238	133.228	30.2976	9411.14	0.489241	165.859
16ALT62-6	152662	5.94781	336.474	54.723	0.0160509	5.58616	0.0174242	0.198193	0.490819	0.25397	3.80914	1.55771	21.2151	9.85213	55.3547	14.3484	157.303	38.3266	10063.6	0.942991	214.95
16ALT62-7	152662	10.1752	363.256	59.6911	0.0719738	7.00532	0.0561304	0.616148	0.597133	0.293534	3.77085	1.59604	23.3422	10.9073	61.9447	15.5434	175.424	43.5266	12913.8	1.57722	439.12
16ALT62-8	152662	5.53001	588.591	60.8129	0.117544	30.3455	0.120633	1.30159	1.85091	0.860575	10.9121	3.78975	44.9428	17.9625	88.2094	21.3712	232.699	53.4272	12948.1	0.649313	264.001
16ALT62-9	152662	7.1998	1194.26	60.5124	1.58821	90.6455	0.762457	7.13624	9.74646	5.27007	40.4954	11.0053	110.327	39.5821	167.665	35.1193	337.199	70.54	9227.21	0.919645	381.577
16ALT62-10	152662	4.31551	157.287	61.6221	0	18.7408	0.0176011	0.357224	0.565925	0.129272	2.88339	0.951252	11.6208	4.62925	24.0198	5.83816	63.1965	15.3532	10295.6	0.37485	50.6324
16ALT62-11	152662	6.25334	294.1	59.9659	0.153518	20.6373	0.0640607	0.672628	1.29641	0.514186	6.1508	1.90425	23.4989	9.34484	45.0508	10.168	104.478	23.4375	8102.28	0.370248	97.2238
16ALT62-12	152662	6.92984	158.578	60.0665	0.160617	17.0368	0.0912029	0.75016	0.847479	0.358696	2.71611	0.911579	11.0771	4.78809	24.5106	6.41012	73.64	19.0818	10973.8	0.433699	88.0893
16ALT62-13	152662	8.79778	409.186	59.8412	1.07135	24.5486	1.13665	8.18167	2.94991	1.52719	10.049	3.07189	34.9137	13.0143	60.0368	13.2727	133.283	29.716	9913.69	0.451467	120.592
16ALT62-14	152662	10.8487	416.285	54.1589	2.47632	38.0088	1.94967	9.55752	2.69667	0.930543	6.6751	2.15843	30.285	12.4809	68.0471	16.3461	170.469	39.1158	10892.6	1.54866	267.548
16ALT62-15	152662	7.29872	461.213	59.1322	0.0793971	6.73675	0.0886397	0.647761	0.7934	0.274741	5.31018	2.16216	30.698	13.8532	74.0479	18.4232	202.683	47.2573	10888.6	1.34053	517.737
16ALT62-16	152662	3.70691	469.481	59.4979	0.0540006	8.49602	0.143945	1.72271	2.35575	1.21835	9.49562	2.9402	35.1126	14.4516	72.6818	17.5607	185.352	46.0599	8663.01	0.477903	160.846
16ALT62-17	152662	2.65636	210.763	59.6804	0.0521526	9.51326	0.032888	0.313819	0.593855	0.201562	3.25351	1.18283	15.7296	6.56677	33.4314	8.09215	89.8676	21.5552	10670.6	0.590814	202.146
16ALT62-18	152662	4.86875	234.14	64.5867	0.199263	10.259	0.201046	1.90663	1.56202	0.886253	5.62329	1.61461	20.3041	7.67064	37.1859	8.47881	84.5696	19.8784	10331	0.34921	61.589
16ALT62-19	152662	8.51192	2078.78	52.9565	0.314021	45.4321	0.248007	2.37419	3.76917	1.94932	26.4829	9.43425	129.734	62.995	357.349	86.0264	906.221	213.294	5885.2	1.30137	345.376
16ALT62-20	152662	2.94322	152.486	61.0788	0.0264047	10.4555	0.0198172	0.467151	0.646223	0.182722	3.04195	0.730896	10.8954	4.23454	24.3602	6.27563	73.1101	19.1376	11372.4	0.444593	86.0815
16ALT62-21	152662	6.32603	211.149	69.039	0.0714486	4.79766	0.0159776	0.273812	0.364259	0.1714	2.21226	0.916462	13.0166	6.12272	35.5781	9.78536	117.919	29.8368	14589.6	0.765605	173.436
16ALT62-22	152662	7.63979	418.438	58.7013	1.10566	23.3111	0.893069	6.61758	3.13717	1.32029	8.89254	2.56651	31.3022	12.7215	68.7083	16.7933	189.008	48.1001	7506.78	0.622433	169.048
16ALT62-23	152662	5.10321	292.097	58.0326	0.0213288	13.7514	0.0645974	0.785552	1.34872	0.403417	5.90835	2.07801	26.6828	9.63504	45.9598	9.47086	90.301	19.5317	8677.67	0.436604	28.9537
16ALT62-24	152662	16.3399	646.721	61.3021	3.67984	69.3955	3.1188	15.504	4.56667	1.57215	10.7531	3.1578	41.8398	18.7241	102.18	26.4246	303.423	76.7842	11882	1.20149	276.208
16ALT62-25	152662	14.0476	172.886	53.2432	2.31585	28.2756	2.65531	17.0043	3.09368	2.47564	3.46414	0.791508	10.2983	4.66212	25.7711	7.06965	87.9122	24.1047	10509.8	0.687177	235.701
16ALT62-26	152662	32.1063	1652.92	53.5125	16.243	245.431	12.3702	62.9226	16.383	6.32372	33.6518	10.7443	133.22	53.1951	253.876	55.5503	532.554	112.401	8627.3	1.56334	561.279
Trace element for sample 16ALT69
16ALT69-1	152662	4.30734	127.412	60.5333	0.0100418	2.57517	0.0150644	0.162163	0.276761	0.270354	2.19699	0.7329	10.1237	4.22332	20.9439	4.83199	52.0688	12.6943	7417.46	0.209411	302.09
16ALT69-2	152662	10.5669	254.829	58.838	0.0205414	9.07211	0.104751	1.28015	1.84218	0.734433	8.13265	2.25904	22.4705	8.22329	36.2004	7.46851	70.7054	15.1289	8292.02	0.574862	67.6968
16ALT69-3	152662	0.285268	44.4996	64.998	0.0186688	1.65574	0.0202505	0.0901736	0.148939	0.0684128	0.82198	0.229956	3.36062	1.50551	7.33999	1.81338	18.595	4.50362	6505.09	0.127434	239.21
16ALT69-4	152662	2.44676	112.349	63.4087	0.00528965	6.70157	0.0220475	0.33745	0.63225	0.262165	3.07589	0.863287	9.45965	3.57172	15.9486	3.41957	34.1388	7.41148	9367.14	0.309962	119.999
16ALT69-5	152662	5.27353	97.442	61.4421	0.00188344	1.61221	0.00849771	0.0960705	0.160793	0.322717	1.21667	0.516551	7.4021	3.20939	15.7953	3.92815	42.4465	10.6442	7566.07	0.264425	273.836
16ALT69-6	152662	4.67808	91.9343	58.3409	0.26832	4.30563	0.206874	1.1518	0.430258	0.329454	1.84014	0.556481	7.5363	2.94373	14.5684	3.45911	34.879	8.17013	6747.6	0.230071	328.317
16ALT69-7	152662	6.43052	1043.68	50.6073	2.1981	10.3974	0.557802	1.98128	1.0318	0.31997	6.94835	3.28417	54.7175	29.8878	189.727	50.7735	589.554	142.557	12135.4	7.11878	798.121
16ALT69-8	152662	13.284	60.9777	61.1241	0.109207	3.53515	0.0409022	0.292477	0.133319	0.209929	0.887282	0.351148	4.42918	1.88654	9.90009	2.37873	25.7345	6.14056	6554.55	0.205756	193.899
16ALT69-9	152662	6.43393	128.486	59.8043	0.0451679	2.64174	0.0234911	0.156115	0.207746	0.184745	1.58461	0.614664	8.31635	4.0985	21.3127	5.43619	58.7674	14.288	7219.86	0.195386	386.54
16ALT69-10	152662	2.62893	104.674	65.5291	0.00487375	4.78161	0.0182575	0.174292	0.16249	0.285369	1.60393	0.57764	7.20011	3.27131	16.9454	4.08225	45.9931	10.5318	8187.57	0.251494	147.798
16ALT69-11	152662	2.72042	97.5188	62.1371	0.079626	2.71187	0.0193797	0.165966	0.252315	0.183431	1.6603	0.580219	7.8599	3.01331	15.893	3.81719	40.4167	9.17056	7665.2	0.216469	329.914
16ALT69-12	152662	7.85784	173.495	64.8806	0.294452	7.60293	0.272154	2.05555	0.929647	0.542306	3.05993	1.09576	14.0261	5.56763	26.483	6.21039	64.5958	14.283	10369.8	0.42244	222.416
16ALT69-13	152662	1.59882	68.8415	64.5124	0.0171762	1.44058	0.0169317	0.0598004	0.15199	0.121139	0.846048	0.306316	5.28233	2.28165	11.5046	2.96008	33.9598	7.94729	9013.2	0.114507	368.467
16ALT69-14	152662	4.51745	208.469	61.6587	0.0107741	8.43963	0.0644588	1.28337	2.04271	0.819961	7.27175	1.90407	19.6929	6.79992	28.7048	6.04058	56.9378	11.4987	8318.05	0.457166	62.719
16ALT69-15	152662	8.10503	252.754	61.7347	0.0841615	10.2146	0.170582	2.62421	3.04226	1.1627	10.2439	2.62532	25.3444	8.44431	35.0738	7.15	64.6808	13.039	8488.86	0.531524	60.2199
16ALT69-16	152662	5.40261	172.291	62.133	0.00906826	9.21161	0.0355705	0.675575	1.46889	0.489546	5.95693	1.53531	15.6971	5.55082	23.8602	4.92136	45.3613	9.36165	8545.7	0.47551	45.2665
16ALT69-17	152662	5.34662	162.054	68.7858	0.0687681	8.8024	0.0392459	0.742564	1.44707	0.472671	5.45335	1.45136	14.7395	5.08339	22.0001	4.5854	43.8246	9.19555	9574.28	0.565936	41.3392
16ALT69-18	152662	13.3334	1240.2	54.039	1.17595	18.6398	0.524331	2.83894	3.70706	1.71274	19.1967	6.9712	89.9389	37.5906	187.203	44.3671	452.322	99.3602	10283.7	1.56059	924.224
16ALT69-19	152662	4.74798	46.1148	64.4323	0.018189	2.76003	0.0179439	0.106109	0.136988	0.124861	0.559811	0.249905	3.41166	1.4481	7.30339	1.87679	20.4733	4.82346	6537.02	0.191489	213.295
16ALT69-20	152662	7.38842	212.94	61.4651	0.0120465	7.99269	0.0704883	1.28721	1.8426	0.655699	7.06098	1.8471	19.5491	6.9002	29.4846	6.24549	58.7292	12.7803	8403.55	0.445127	71.8578
16ALT69-21	152662	6.12674	220.539	60.5048	0.0651802	8.56574	0.186639	2.14485	2.50927	0.898809	8.64574	2.08221	21.7547	7.19053	30.6312	6.48603	60.371	12.8565	7860.05	0.605471	44.5056
16ALT69-22	152662	6.88801	354.236	56.9138	0.0265941	11.1318	0.143903	2.61066	3.62413	1.53643	12.1543	2.99918	32.7804	11.3506	49.6281	10.0271	93.7397	19.1719	8514.35	1.59845	416.239
16ALT69-23	152662	4.91401	228.637	62.5866	0.0779221	9.3918	0.0845407	1.30569	2.01493	0.755654	8.22716	2.29434	22.5763	7.63648	31.0042	6.32888	57.0837	11.836	8583.68	0.547068	53.0751
16ALT69-24	152662	0	111.451	61.9117	0.00806056	1.62211	0.00660186	0.0616347	0.213447	0.194601	1.52506	0.636207	8.8369	3.72091	18.7172	4.44269	49.2696	11.9838	7311.83	0.20256	195.446
16ALT69-25	152662	4.65518	143.369	61.5109	0.00963004	8.21795	0.0395664	0.430898	0.932294	0.37091	4.20621	1.20793	12.6424	4.4347	19.6992	4.18101	39.3844	8.09742	8782.78	0.454778	40.6975
*N.D. = not determined.
